# Supplementary figures and images for: Graph-guided multi-task sparse learning model: a method for identifying antigenic variants of influenza A(H3N2) virus
Source: Oxford University Press journal article supplement (doi:10.1093/bioinformatics/bty457), 2018-06-06

Figure S1

A

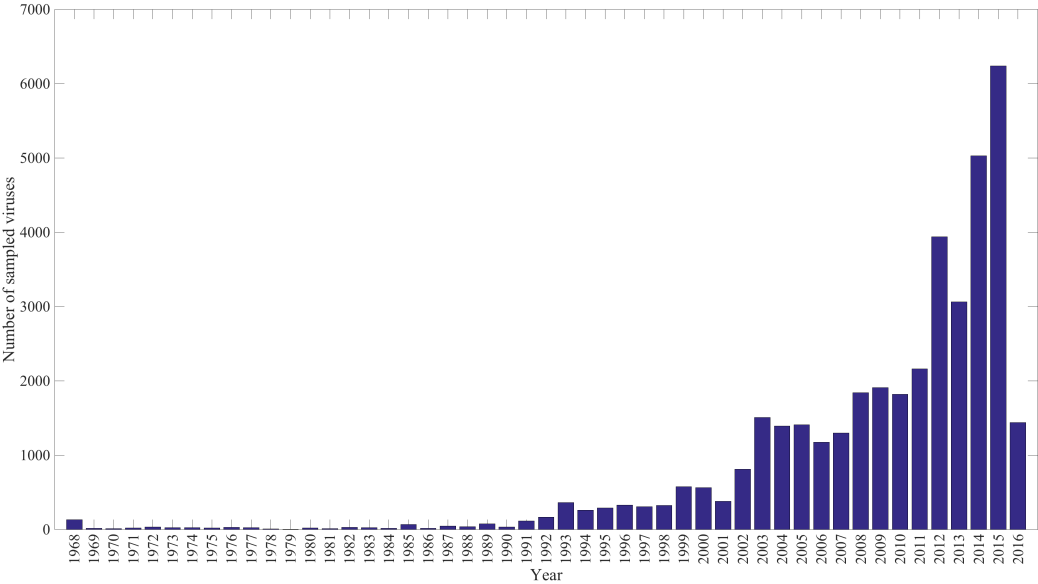

B

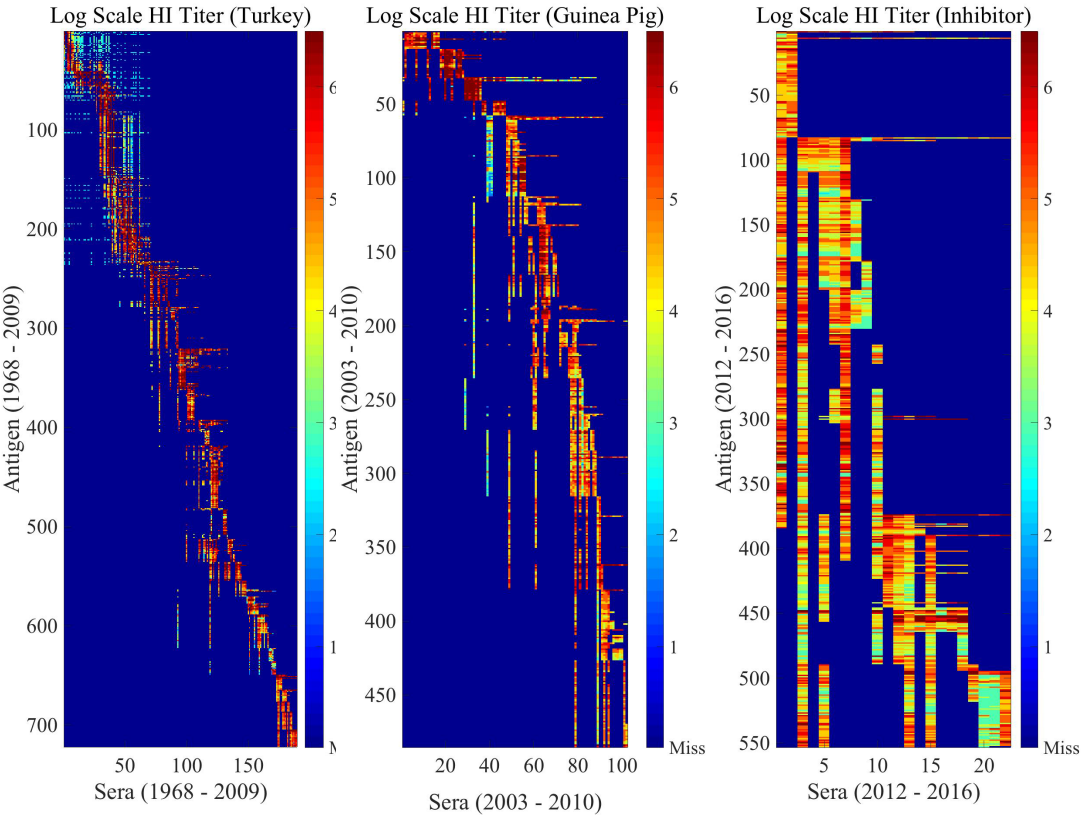

Supplement: bioinformatics_35_1_77_s1.pdf [file bioinformatics_35_1_77_s1.pdf]

# Figure S2

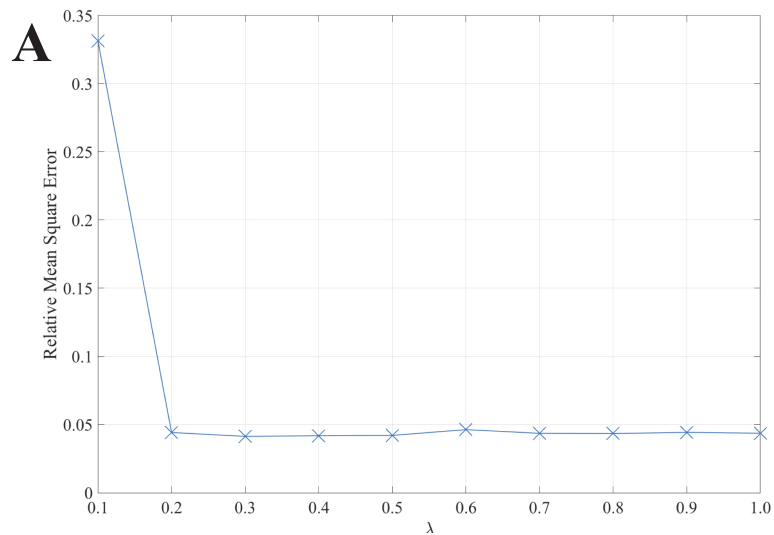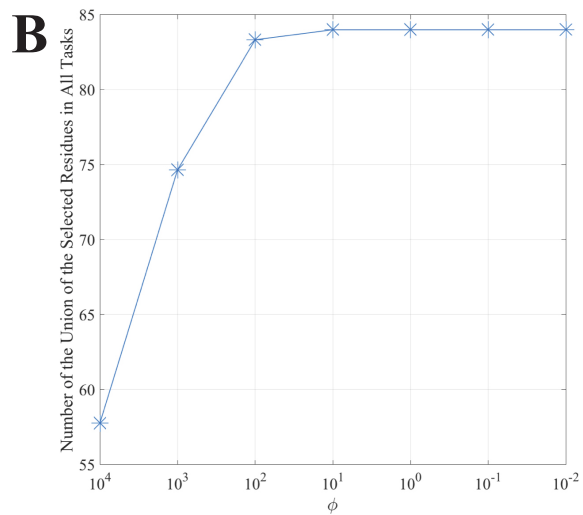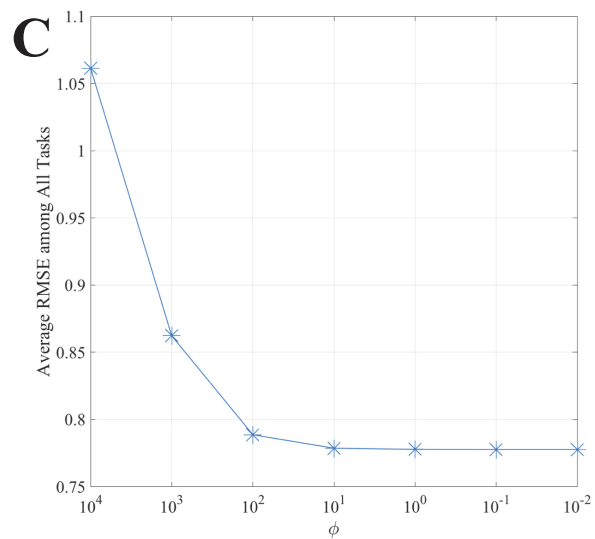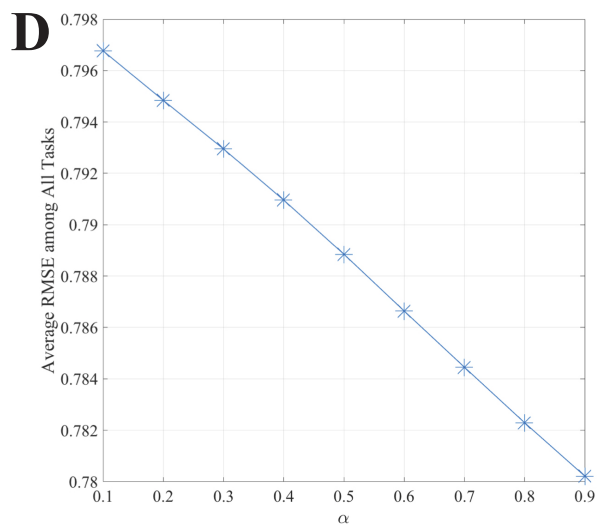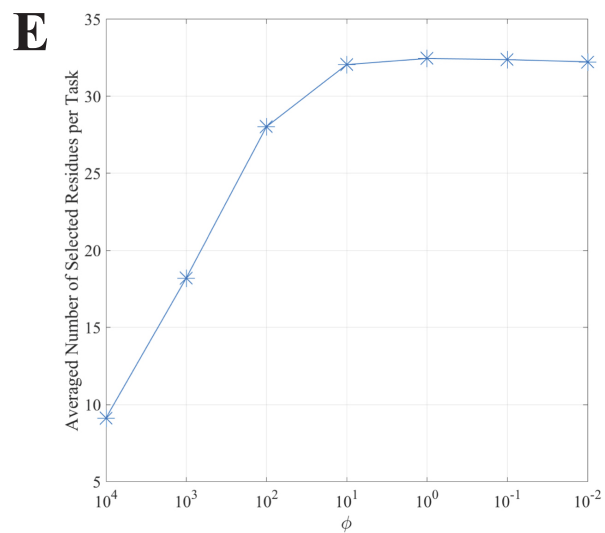

Supplement: bioinformatics_35_1_77_s2.pdf [file bioinformatics_35_1_77_s2.pdf]

Figure S3

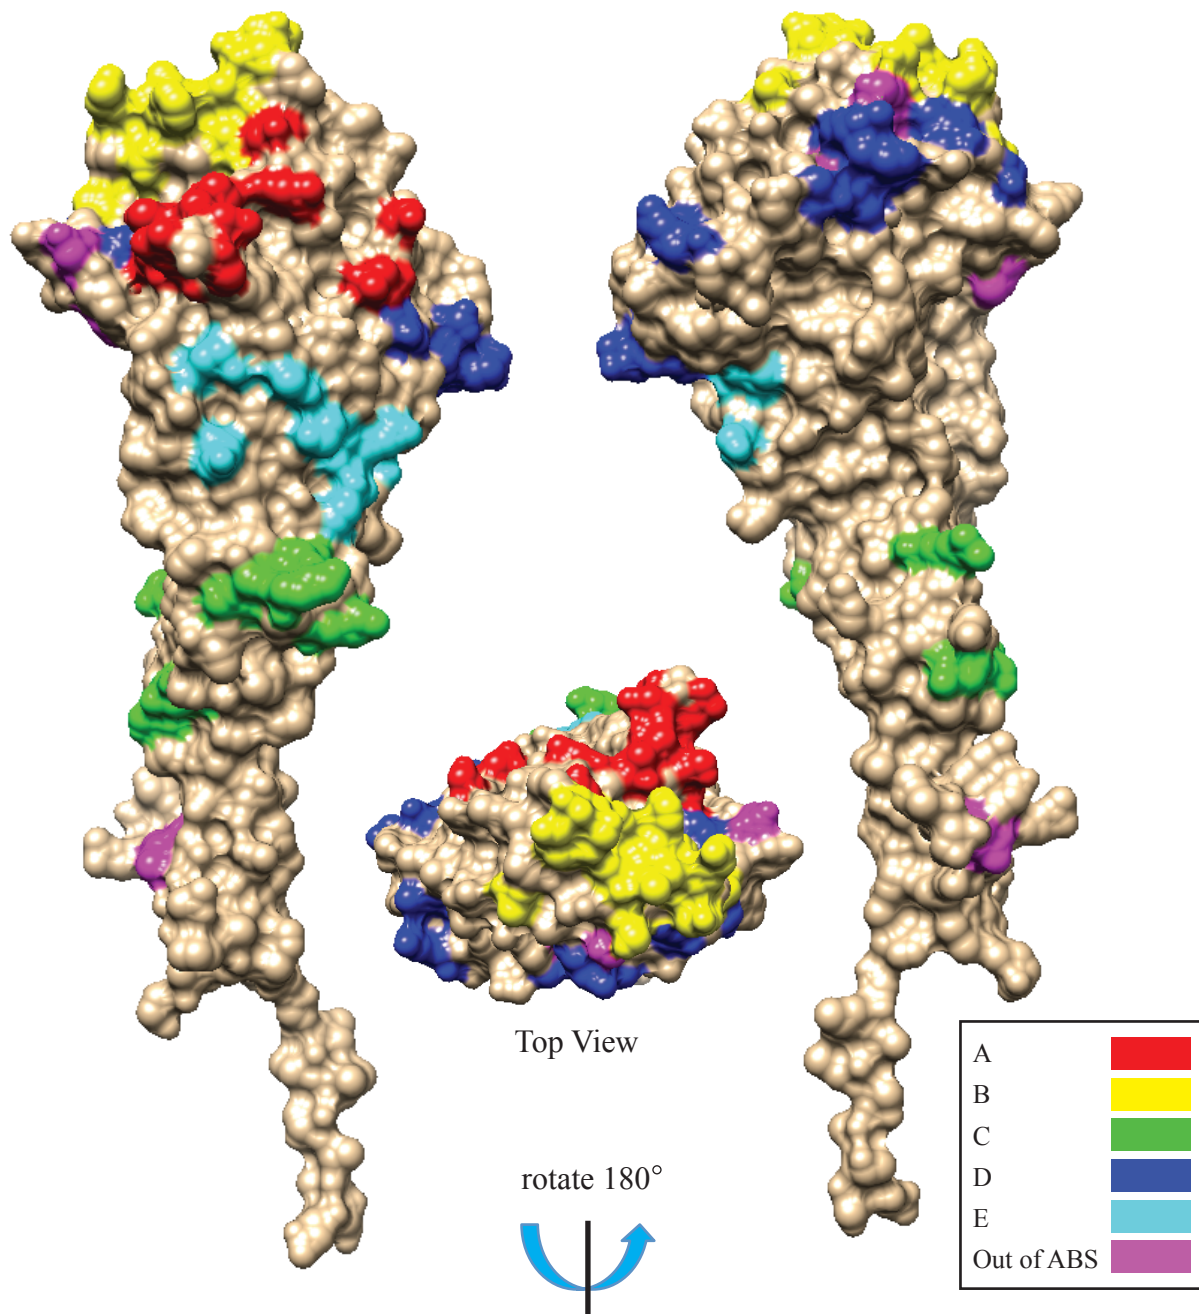

Supplement: bioinformatics_35_1_77_s3.pdf [file bioinformatics_35_1_77_s3.pdf]
